# Supplementary material for: Rs488087 single nucleotide polymorphism as predictive risk factor for pancreatic cancers
Source: PubMed Central journal article supplement (PMC4741865; doi:10.18632/oncotarget.5627), 2015-10-16
Supplement: oncotarget-06-39855-s001.pdf [file oncotarget-06-39855-s001.pdf]

## SUPPLEMENTARY DATA

### DROPLET DIGITAL PCR

Droplet-Digital PCR (ddPCR) technology provides an absolute count of target DNA copies per input sample without the need for standard curves determination allowing a robust quantification of target DNA [29]. With ddPCR, a sample is partitioned so that individual nucleic acid molecules (15 000 droplets of 1nL, limiting dilution of 0 at 1 DNA copy/droplet) within the sample are localized and concentrated within many separate regions. The partitioning of the sample allows the quantification of molecules according to Poisson's Law. Each part will contain "0" or "1" molecules, or a negative or positive reaction, respectively. After PCR amplification, nucleic acids may be quantified by counting the droplets that contain PCR end-product, positive reactions.

The ddPCR reaction contained: ddPCR supermix for probes (Bio-Rad Laboratories), 100 to 250 mM of each probe (comprising a fluorophore quencher pair), and 450 to 900 mM of each primer and 33 pg to 50 ng of template DNA in a final volume of 20  $\mu$ L. A total of 22  $\mu$ L of each reaction mixture was prepared and 20  $\mu$ L without bubbles were loaded onto a disposable plastic cartridge (Bio-Rad) with 70  $\mu$ L of droplet generation oil (Bio-Rad) and placed in the QX Droplet Generator (Bio-Rad). The ddPCR began by partitioning the TaqMan reaction mix containing sample DNA into aqueous droplets in oil via the droplet generator, after transfer of droplets to a 96-well PCR plate, followed by a thermocycling protocol (95°C x 10 min; 40 cycles of

[94°C x 30s, 54°C x 1 min]; 98°C x 10 min). The PCR plate was then transferred to the QX100 Droplet Reader for automatic reading of samples in each well. Data were analyzed with QuantaSoft analysis software (BioRad Laboratories).

### DETECTION OF KRAS SOMATIC MUTATIONS

We extracted DNA from 4  $\mu$ m formalin fixed paraffin embedded tumor sections blades. Each blade was accompanied by a blade colored with Hematoxyline-Eosine-Safran (HES) on which the zone containing the tumor cells was delimited by an experienced anatomo-pathologist and emphasized by strapping and the proportion of tumor cells indicated. The first stage consisted in dewaxing by Microclearing<sup>®</sup> (DiaPath, Italy) followed by slow tissue rehydration. DNA were purified by automated extraction on EVO75 (Tecan), according to the Macherey-Nagel protocol; NR (NucleoSpin<sup>®</sup> 96 Blood; NucleoSpin<sup>®</sup> 8 Viruses Binding Strips ; Macherey Nagel). We routinely uses qPCR-High Resolution Melting (qPCR-HRM) for *Kras* exon 2, 3 and 4 as a screening technique, allowing to avoid useless sequencing of not mutated samples. The type of mutations defined as "not wild type" by PCR-HRM, is determined by Sanger sequencing (MixBigDye<sup>®</sup>, Roche) after DNA purification (ExoSap-IT<sup>®</sup>), pipeting being automated on Evo75<sup>®</sup>, (Tecan). The sequences are analyzed on 3500 or 3130 Dx Genetic Analyser<sup>®</sup> (Applied Biosystems). The analytical chain was accredited according to Iso-Norm 15189 (agreement num: 8-1739).

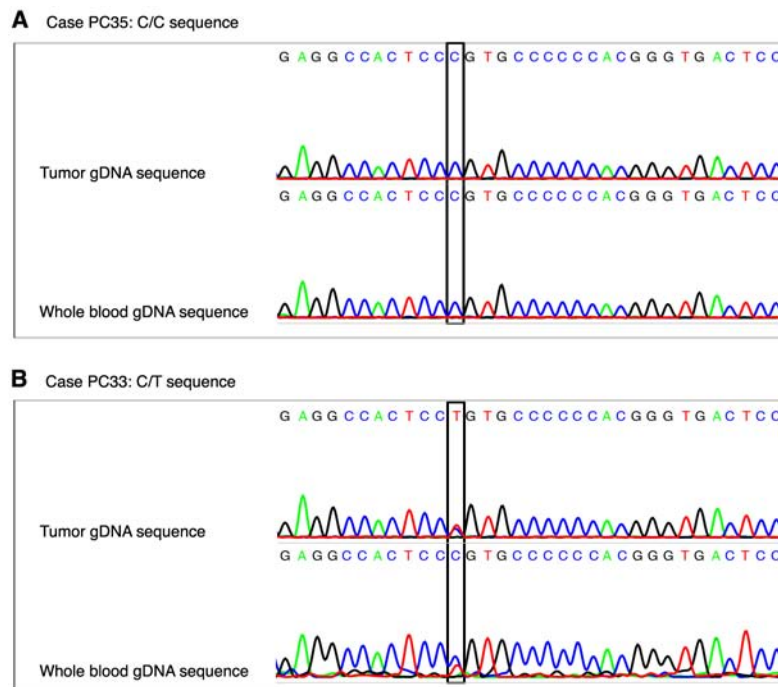

**Supplementary Figure S1: Analysis of the electropherogram obtained after the sequencing of the amplicons by Sanger technique on several samples from the same patient. A.** Case PC35: homozygous C/C patient: concordance between genomic DNA (gDNA) extracted from the tumor and that from whole blood. **B.** Case PC33: heterozygous C/T patient: concordance among gDNA extracted from the tumor and from blood.

**Supplementary Table S1: SNPs predictive of a pancreatic cancer**

| Chromosomes | Locus  | Ancestry         | SNP Nb   | Nearest gene | OR        | Ref   |
|-------------|--------|------------------|----------|--------------|-----------|-------|
| 1           | q32.1  | European         | 37908844 | NR5A2        | 0.77      | 8, 9  |
|             | p36.13 | European         | 16861827 | IGSF21       | 1.7       | 9     |
| 2           | p13.3  | European         | 1486134  | ETAA1        | 1.14      | 10    |
| 3           | q29    | European         | 9854771  | TP63         | 0.89      | 10    |
| 5           | p13.1  | European/Chinese | 225280   | DAB2         | 0.81/0.74 | 11,12 |
|             | p15.33 | European         | 27336098 | CLPTMIL-TERT | 0.8/1.19  | 8     |
|             |        |                  | 4011681  |              | 1.06      | 8     |
| 6           | p25.3  | Japanese         | 9502893  | FOXQ1        | 1.29      | 13    |
| 7           | q32.3  | European         | 6971499  | LINC-PINT    | 0.79      | 11    |
|             | q36.2  | European         | 167020   | SHH          | 1.17/1.38 | 14    |
|             |        | European         | 172310   | SHH          | 1.17/1.36 | 14    |
|             |        | European         | 288746   | SHH          | 1.18/1.39 | 14    |
|             |        | Japanese         | 6464375  | DPP6         | 1.13      | 13    |
|             |        | Japanese         | 7779540  | DPP6         | 1.14      | 13    |
|             |        | Japanese         | 6973850  | DPP6         | 1.1       | 13    |
|             |        | Japanese         | 1048768  | DPP6         | 1.13      | 13    |
|             | p13    | European         | 17688601 | SUGCT        | 0.88      | 10    |
| 8           | q24.21 | European         | 1561927  | PVT1         | 0.87      | 11    |
| 9           | q34    | European         | 505922   | ABO locus    | 1.20/1.44 | 14    |
|             |        |                  | 495828   |              | 1.19/1.43 | 14    |
|             |        |                  | 657152   |              | 1.19/1.41 | 14    |
|             |        |                  | 630014   |              | 0.85/0.71 | 14    |
| 10          | q26.11 | European/Chinese | 12413624 | PRLHR        | 1.23      | 12    |
| 11          | p15.4  | European         | 12362504 | SBF2         | 1.4       | 9     |
|             |        |                  | 10500715 | SBF2         | 0.74      | 9     |
| 12          | p11.21 | Japanese         | 708224   | B1CD1        | 1.32      | 13    |
| 13          | q12.2  | European         | 9581943  | PVDX1        | 1.15      | 11    |
|             | q22.1  | European/Chinese | 9543325  | KFL5         | 1.26      | 8,12  |
|             |        |                  | 9564966  | KFL12        | 1.21      | 8     |
| 15          | q14    | European         | 8028529  | none         | 1.14/1.31 | 14    |
|             |        |                  | 4130461  | none         | 1.10/1.21 | 14    |
|             |        |                  | 4459505  | none         | 1.13/1.28 | 14    |
| 16          | q23.1  | European         | 7190458  | CTRB1/B2     | 1.46/0.79 | 11    |
| 17          | q25.1  | European         | 11655237 | LINC00673    | 1.26      | 10    |
| 18          | p11.21 | European         | 981621   | C18orf1      | 1.39      | 9     |
| 21          | q21.3  | European/Chinese | 372883   | BACH1        | 0.79/0.69 | 12    |
|             | q22.3  | European/Chinese | 1547374  | TFF          | 0.79/0.79 | 12    |
| 22          | q12.1  | European         | 16986825 | ZNRF3        | 1.18      | 11    |
|             | q13.32 | European/Chinese | 5768709  | FAM19A5      | 0.23      | 12    |

**Supplementary Table S2: Cancer-free control group**

| Individuals | Age <sup>1</sup> | Gender <sup>2</sup> | SNP rs 488087 |
|-------------|------------------|---------------------|---------------|
| CTL 1       | 39               | 0                   | C/T           |
| CTL 2       | 31               | 0                   | C/C           |
| CTL 3       | 37               | 0                   | C/T           |
| CTL 4       | 37               | 1                   | C/T           |
| CTL 5       | 39               | 0                   | C/C           |
| CTL 6       | 23               | 0                   | C/C           |
| CTL 7       | 24               | 0                   | C/T           |
| CTL 8       | 38               | 0                   | C/C           |
| CTL 9       | 25               | 0                   | C/C           |
| CTL 10      | 33               | 0                   | C/C           |
| CTL 11      | 34               | 0                   | C/C           |
| CTL 12      | 23               | 0                   | C/C           |
| CTL 13      | 30               | 0                   | C/T           |
| CTL 14      | 34               | 0                   | C/T           |
| CTL 15      | 43               | 0                   | C/C           |
| CTL 16      | 36               | 0                   | C/C           |
| CTL 17      | 34               | 0                   | C/C           |
| CTL 18      | 28               | 0                   | C/C           |
| CTL 19      | 30               | 1                   | C/C           |
| CTL 20      | 47               | 0                   | C/C           |
| CTL 21      | 37               | 0                   | T/T           |
| CTL 22      | 54               | 0                   | C/C           |
| CTL 23      | 41               | 0                   | T/T           |
| CTL 24      | NC               | 0                   | C/C           |
| CTL 25      | 31               | 0                   | C/C           |
| CTL 26      | NC               | NC                  | C/T           |
| CTL 27      | 31               | 0                   | C/C           |
| CTL 28      | 16               | 0                   | C/C           |
| CTL 29      | 31               | 0                   | C/T           |
| CTL 30      | 33               | 0                   | C/T           |
| CTL 31      | 25               | 0                   | C/C           |
| CTL 32      | 33               | 0                   | C/C           |
| CTL 33      | 20               | 0                   | C/C           |
| CTL 34      | 31               | 0                   | C/C           |
| CTL 35      | 21               | 0                   | C/C           |
| CTL 36      | 21               | 0                   | T/T           |

(Continued)

| Individuals | Age <sup>1</sup> | Gender <sup>2</sup> | SNP rs 488087 |
|-------------|------------------|---------------------|---------------|
| CTL 37      | 36               | 1                   | C/C           |
| CTL 38      | 23               | 0                   | C/C           |
| CTL 39      | 22               | 0                   | C/C           |
| CTL 40      | 29               | 0                   | C/C           |
| CTL 41      | 19               | 0                   | C/C           |
| CTL 42      | 16               | 0                   | C/C           |
| CTL 43      | 40               | 0                   | C/C           |
| CTL 44      | 23               | 0                   | C/C           |

CTL: Control. NC: data not communicated. <sup>1</sup>: in years. <sup>2</sup>: Male 0, Female 1.

**Supplementary Table S3: Clinical data of patients with pancreatic cancers (PC)**

| Patients | Diseases | Age <sup>1</sup> | Gender <sup>2</sup> | Tumor<br>(diameter <sup>3</sup> ) | TNM <sup>4</sup> |   |   | Grade <sup>5</sup> | SNP rs488087 |
|----------|----------|------------------|---------------------|-----------------------------------|------------------|---|---|--------------------|--------------|
|          |          |                  |                     |                                   | T                | N | M |                    |              |
| PC 1     | PDAC     | 59               | 0                   | 4.5                               | 2                | 1 | 0 | 2B                 | C/T          |
| PC 2     | PDAC     | 66               | 0                   | 3.5                               | 3                | 0 | 0 | 2A                 | C/T          |
| PC 3     | PDAC     | 54               | 0                   | 3                                 | 3                | 1 | 0 | 4                  | C/C          |
| PC 4     | PDAC     | 73               | 1                   | 1.8                               | 3                | 1 | 0 | 2B                 | C/T          |
| PC 5     | PDAC     | 62               | 0                   | 2                                 | 3                | 1 | 0 | 2B                 | C/C          |
| PC 6     | PDAC     | 57               | 1                   | 4.3                               | 4                | 1 | 1 | 4                  | T/T          |
| PC 7     | MC       | 69               | 0                   | NC                                | NC               |   |   | NC                 | C/T          |
| PC 8     | PDAC     | 70               | 0                   | 2.3                               | 3                | 1 | 0 | 2B                 | C/C          |
| PC 9     | PDAC     | 63               | 1                   | 2.5                               | 3                | 1 | 0 | 2B                 | C/T          |
| PC 10    | PDAC     | 66               | 0                   | 6                                 | 3                | 0 | 0 | 2A                 | C/C          |
| PC 11    | PDAC     | 58               | 1                   | 5.2                               | 2                | 1 | 0 | 2B                 | C/C          |
| PC 12    | PDAC     | 67               | 1                   | 1.5                               | 3                | 0 | 0 | 2A                 | C/T          |
| PC 13    | PDAC     | 64               | 0                   | 4.7                               | 3                | 1 | 1 | 4                  | C/T          |
| PC 14    | PDAC     | 57               | 1                   | 6                                 | 3                | 1 | 0 | 2B                 | T/T          |
| PC 15    | PDAC     | 63               | 1                   | 4.5                               | 3                | 0 | 0 | 2B                 | C/C          |
| PC 16    | PDAC     | 66               | 1                   | 2.5                               | 3                | 0 | 0 | 2A                 | C/T          |
| PC 17    | PDAC     | 66               | 1                   | 2.5                               | 3                | 0 | 0 | 2A                 | C/T          |
| PC 18    | MA       | 73               | 1                   | 2.4                               | 4                | 1 | 0 | NC                 | C/C          |
| PC 19    | PDAC     | 79               | 1                   | 2                                 | 3                | 0 | 0 | 2A                 | C/C          |
| PC 20    | PDAC     | 57               | 0                   | 3                                 | 3                | 0 | 0 | 2A                 | C/C          |
| PC 21    | EC       | 81               | 1                   | 3                                 | 3                | 1 | 0 | NC                 | C/T          |
| PC 22    | PDAC     | 62               | 0                   | 3                                 | 3                | 0 | 0 | 2A                 | C/C          |
| PC 23    | PDAC     | 53               | 1                   | 2                                 | 1                | 0 | 0 | 2A                 | C/T          |
| PC 24    | EC       | 67               | 0                   | 1.3                               | 3                | 1 | 0 | 2B                 | C/T          |
| PC 25    | PDAC     | 61               | 1                   | 2.3                               | 3                | 1 | 0 | 2B                 | C/C          |
| PC 26    | MA       | 60               | 1                   | 2.5                               | 4                | 1 | 0 | NC                 | C/C          |
| PC 27    | PDAC     | 72               | 0                   | 3                                 | 3                | 1 | 0 | 2B                 | C/T          |
| PC 28    | PDAC     | 69               | 1                   | 3.5                               | 3                | 0 | 0 | 2A                 | C/T          |
| PC 29    | PDAC     | 57               | 1                   | 3.7                               | 3                | 1 | 0 | 2B                 | T/T          |
| PC 30    | PDAC     | 73               | 1                   | 2                                 | 2                | 0 | 0 | 1B                 | T/T          |
| PC 31    | PDAC     | 50               | 1                   | 3                                 | 2                | 1 | 0 | 2B                 | C/T          |
| PC 32    | PDAC     | 87               | 1                   | 3                                 | 3                | 1 | 0 | 2B                 | C/C          |

(Continued)

| Patients | Diseases | Age <sup>1</sup> | Gender <sup>2</sup> | Tumor | TNM <sup>4</sup> |   |   | Grade <sup>5</sup> | SNP rs488087 |
|----------|----------|------------------|---------------------|-------|------------------|---|---|--------------------|--------------|
| PC 33    | PDAC     | 85               | 0                   | 3.3   | 3                | 1 | 0 | 2B                 | C/T          |
| PC 34    | PDAC     | 79               | 1                   | 3.5   | 3                | 1 | 0 | 2B                 | C/T          |
| PC 35    | PDAC     | 73               | 1                   | 4.1   | 3                | 1 | 0 | 2B                 | C/T          |
| PC 36    | EC       | 83               | 0                   | 6.5   | NC               |   |   | 2B                 | C/T          |

PC: Pancreatic Cancer. PDAC: Pancreatic Ductal Adenocarcinoma. MC: Mucinous Cystadenoma. MA: Malignant Ampulloma.

EC: Endocrine Carcinoma. SNP: single nucleotide polymorphism. NC: data not communicated. <sup>1</sup>: in years. <sup>2</sup>: Male 0, Female 1.

<sup>3</sup>: in centimeters. <sup>4</sup>: TNM stage: T: Tumor, N: Node, M: Metastasis. <sup>5</sup>: Tumor grade (WHO).

**Supplementary Table S4: Clinical data of the cohort of patients with non-malignant pancreatic diseases (non-MPD)**

| Patients   | Diseases | Age <sup>1</sup> | Gender <sup>2</sup> | SNP rs488087 |
|------------|----------|------------------|---------------------|--------------|
| non-MPD 1  | IMPT     | 69               | 0                   | C/C          |
| non-MPD 2  | IMPT     | 56               | 0                   | C/C          |
| non-MPD 3  | CCP      | 61               | 0                   | C/T          |
| non-MPD 4  | CCP      | 72               | 0                   | C/C          |
| non-MPD 5  | CCP      | 71               | 1                   | T/T          |
| non-MPD 6  | RT       | 76               | 1                   | C/C          |
| non-MPD 7  | CCP      | 40               | 1                   | C/C          |
| non-MPD 8  | CCP      | 73               | 0                   | C/C          |
| non-MPD 9  | CCP      | 53               | 1                   | C/C          |
| non-MPD 10 | IMPT     | 74               | 1                   | C/C          |
| non-MPD 11 | IMPT     | 71               | 0                   | C/C          |
| non-MPD 12 | CCP      | 48               | 0                   | C/C          |
| non-MPD 13 | CCP      | 53               | 1                   | C/C          |
| non-MPD 14 | CCP      | 54               | 0                   | C/T          |
| non-MPD 15 | CCP      | 68               | 0                   | C/T          |
| non-MPD 16 | CCP      | 45               | 0                   | C/T          |
| non-MPD 17 | CCP      | 69               | 1                   | C/C          |
| non-MPD 18 | CCP      | 43               | 0                   | C/T          |
| non-MPD 19 | CCP      | 62               | 0                   | C/T          |

IMPT: intra-papillary mucinous tumor of the pancreas. CCP: chronic calcifying pancreatitis

RT: Retention cyst. <sup>1</sup>: years. <sup>2</sup>: Male: 0, Female: 1.



**Supplementary Table S5: Clinical data of the cohort of patients with non-pancreatic malignancies**

| Patients | Diseases | Age <sup>1</sup> | Gender <sup>2</sup> | Grade <sup>3</sup> | SNP rs488087 |
|----------|----------|------------------|---------------------|--------------------|--------------|
| OC 1     | GB       | 78               | 0                   | 4                  | C/T          |
| OC 2     | ELC      | 64               | 0                   | 4                  | C/C          |
| OC 3     | GB       | 20               | 0                   | 4                  | C/T          |
| OC 4     | PBC      | 64               | 0                   | 2B                 | C/C          |
| OC 5     | GB       | 59               | 0                   | 4                  | C/C          |
| OC 6     | LA       | 37               | 0                   | 3A                 | C/C          |
| OC 7     | ELC      | 66               | 1                   | 3A                 | C/C          |
| OC 8     | LA       | 79               | 1                   | 4                  | C/C          |
| OC 9     | GB       | 52               | 0                   | 4                  | C/C          |
| OC 10    | GB       | 51               | 0                   | 4                  | C/C          |
| OC 11    | GB       | 63               | 0                   | 4                  | T/T          |
| OC 12    | GB       | 76               | 0                   | 4                  | C/T          |
| OC 13    | LA       | 77               | 0                   | 4                  | C/C          |
| OC 14    | LA       | 74               | 0                   | 4                  | C/T          |
| OC 15    | GIST     | 42               | 1                   | NC                 | C/C          |
| OC 16    | GB       | 48               | 0                   | 4                  | C/C          |
| OC 17    | GB       | 72               | 0                   | 4                  | C/C          |
| OC 18    | GB       | 56               | 0                   | 4                  | T/T          |
| OC 19    | GB       | 54               | 0                   | 4                  | C/C          |
| OC 20    | GB       | 39               | 0                   | 4                  | C/C          |
| OC 21    | GB       | 37               | 1                   | 4                  | C/C          |
| OC 22    | GB       | 75               | 0                   | 4                  | C/C          |
| OC 23    | GB       | 68               | 0                   | 4                  | C/C          |
| OC 24    | GB       | 46               | 0                   | 4                  | C/C          |
| OC 25    | GB       | 77               | 1                   | 4                  | C/C          |
| OC 26    | LA       | 61               | 1                   | 4                  | C/T          |
| OC 27    | LA       | 45               | 0                   | 4                  | T/T          |
| OC 28    | ELC      | 74               | 0                   | 3B                 | T/T          |
| OC 29    | LA       | 61               | 0                   | 3B                 | C/C          |
| OC 30    | LA       | 47               | 1                   | 4                  | C/C          |
| OC 31    | LA       | 64               | 1                   | 4                  | C/C          |
| OC 32    | GB       | 49               | 0                   | 4                  | C/C          |
| OC 33    | LA       | 72               | 0                   | 4                  | C/T          |
| OC 34    | GB       | 48               | 1                   | 4                  | C/C          |
| OC 35    | GB       | 59               | 1                   | 4                  | C/C          |
| OC 36    | SCLC     | 81               | 0                   | –                  | C/T          |

(Continued)

| Patients | Diseases | Age <sup>1</sup> | Gender <sup>2</sup> | Grade <sup>3</sup> | SNP rs488087 |
|----------|----------|------------------|---------------------|--------------------|--------------|
| OC 37    | ELC      | 63               | 0                   | 4                  | C/C          |
| OC 38    | LA       | 73               | 0                   | 4                  | C/T          |
| OC 39    | LA       | 48               | 0                   | 4                  | C/T          |
| OC 40    | SCLC     | 61               | 0                   | -                  | C/T          |
| OC 41    | SCLC     | 65               | 0                   | -                  | C/C          |
| OC 42    | LA       | 52               | 0                   | 4                  | C/C          |
| OC 43    | GB       | 68               | 0                   | 4                  | C/T          |
| OC 44    | GB       | 53               | 0                   | 4                  | C/C          |
| OC 45    | GB       | 53               | 0                   | 4                  | C/T          |
| OC 46    | LA       | 59               | 0                   | 4                  | C/C          |
| OC 47    | GB       | 59               | 1                   | 4                  | C/C          |
| OC 48    | GB       | 69               | 0                   | 4                  | C/C          |
| OC 49    | ELC      | 49               | 0                   | 2B                 | C/T          |
| OC 50    | GB       | 73               | 0                   | 4                  | C/T          |
| OC 51    | GB       | 63               | 1                   | 4                  | C/T          |
| OC 52    | GB       | 70               | 1                   | 4                  | C/T          |
| OC 53    | LA       | 79               | 0                   | 4                  | C/C          |
| OC 54    | ELC      | 70               | 0                   | 4                  | C/C          |
| OC 55    | ULC      | 61               | 0                   | 4                  | C/C          |
| OC 56    | GB       | 51               | 1                   | 4                  | C/C          |
| OC 57    | GIST     | 34               | 0                   | NC                 | C/C          |
| OC 58    | ELC      | 65               | 1                   | 4                  | C/C          |
| OC 59    | LA       | 51               | 1                   | 4                  | C/C          |
| OC 60    | GB       | 69               | 0                   | 4                  | C/C          |
| OC 61    | GB       | 67               | 0                   | 4                  | C/T          |
| OC 62    | GB       | 54               | 1                   | 4                  | C/T          |
| OC 63    | SCLC     | 70               | 0                   | -                  | C/T          |
| OC 64    | LA       | 66               | 0                   | 4                  | C/C          |
| OC 65    | LA       | 73               | 0                   | 4                  | C/T          |
| OC 66    | LA       | 71               | 0                   | 4                  | C/T          |
| OC 67    | ELC      | 71               | 0                   | 4                  | C/T          |
| OC 68    | LA       | 65               | 1                   | 4                  | C/T          |
| OC 69    | GB       | 64               | 0                   | 4                  | C/T          |
| OC 70    | GB       | 75               | 0                   | 4                  | C/T          |
| OC 71    | GB       | 45               | 1                   | 4                  | C/C          |
| OC 72    | GB       | 59               | 0                   | 4                  | C/T          |

(Continued)

| Patients | Diseases | Age <sup>1</sup> | Gender <sup>2</sup> | Grade <sup>3</sup> | SNP rs488087 |
|----------|----------|------------------|---------------------|--------------------|--------------|
| OC 73    | GB       | 68               | 0                   | 4                  | C/T          |
| OC 74    | GB       | 61               | 0                   | 4                  | C/T          |
| OC 75    | GB       | 55               | 0                   | 4                  | C/T          |
| OC 76    | GB       | 51               | 0                   | 4                  | C/C          |
| OC 77    | IC       | 76               | 0                   | 1B                 | C/C          |
| OC 78    | ELC      | 64               | 0                   | 4                  | C/C          |

NC: data not communicated. GB: Glioblastoma. ELC: Epidermoid Lung Carcinoma. LA: Lung Adenocarcinoma.

SCLC: Small cell lung carcinoma. GIST: Gastrointestinal Stromal Tumor. PBC: Pancreatobiliary cancer. IC: Intestinal Cancer

ULC: Undifferentiated lung carcinoma. 1: In years. 2: Male 0, Female 1. 3: Tumor grade (WHO).
